# Supplementary material for: Epsilon-Globin HBE1 Enhances Radiotherapy Resistance by Down-Regulating BCL11A in Colorectal Cancer Cells
Source: PubMed Central journal article supplement (PMC6521047; doi:10.3390/cancers11040498), 2019-04-08
Supplement: cancers-11-00498-s001.pdf [file cancers-11-00498-s001.pdf]

# Supplementary Materials: Expression of epsilon-globin HBE1 enhances radiotherapy resistance via the downregulation of BCL11A in colorectal cancer cells

Sang Yoon Park, Seon-Jin Lee, Hee Jun Cho, Jong-Tae Kim, Hyang Ran Yoon, Kyung Ho Lee, Bo Yeon Kim, Younghee Lee and Hee Gu Lee

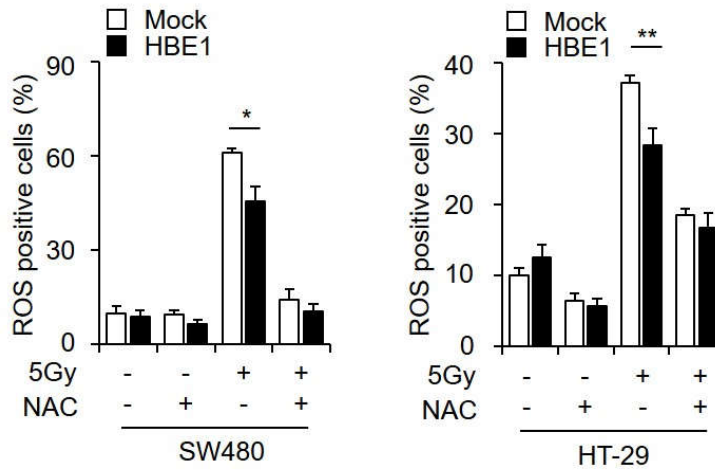

**Figure S1.** Mock and HBE1 expressing cells were treated with or without NAC and Radiation induced intracellular ROS levels measured by flow cytometry using CM-H2DCFDA at 48 hr after exposure to 5 Gy of irradiation. \*  $p < 0.05$ , \*\*  $p < 0.01$ .

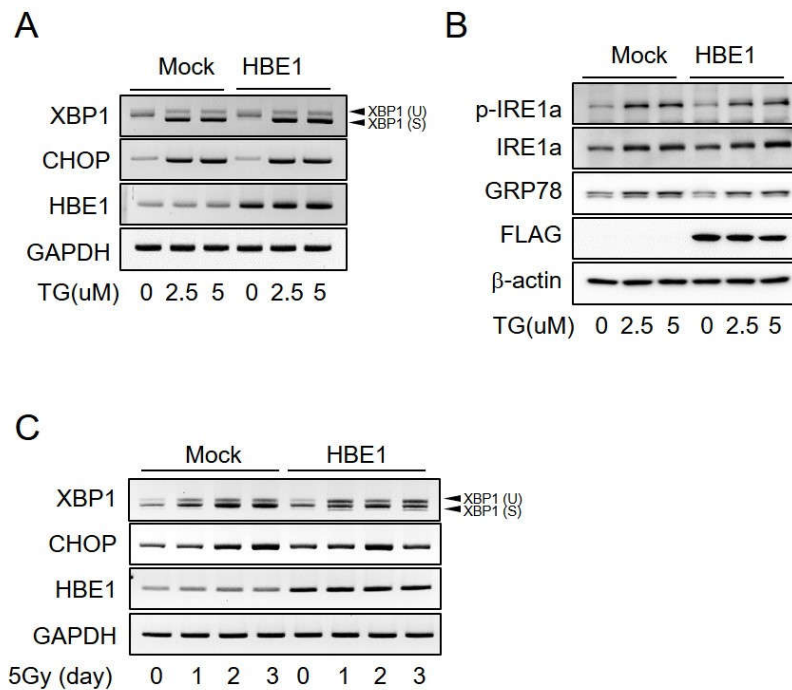

**Figure S2.** (A) Total RNAs were harvested from thapsigargin (TG) treated mock and HBE1 expressing cells and XBP1, CHOP, HBE1, GAPDH mRNA expression levels were evaluated by conventional RT-PCR. (B) and then protein expression for p-IRE1a, IRE1a, GRP78, FLAG  $\beta$ -actin was determined by Western immunoblot analysis.  $\beta$ -actin served as the standard. (C) radiation induced ER-stress was assed via Activation of XBP-1 and CHOP mRNA expression analysis by RT-PCR. GAPDH served as the standard.
